# Supplementary material for: Molecular Epidemiology of Photobacterium damselae subsp. damselae Outbreaks in Marine Rainbow Trout Farms Reveals Extensive Horizontal Gene Transfer and High Genetic Diversity
Source: Front Microbiol. 2018 Sep 19;9:2155. doi: 10.3389/fmicb.2018.02155 (PMC6156455; doi:10.3389/fmicb.2018.02155)
Supplement: Supplementary file 2 [file Table_2.PDF]

**Supplementary Table S2.** Homologies of *P. damsela* subsp. *damsela* proteins encoded by the variable regions downstream *trpR* gene. The six proteins predicted in isolate DK3 and two proteins in isolate DK20 are shown. These proteins are encoded by the variable genes depicted in Figure 6 in the manuscript.

| Feature ID | Length (bp) | Function of the predicted protein                  | Homologue Matches |                                |            |         |
|------------|-------------|----------------------------------------------------|-------------------|--------------------------------|------------|---------|
|            |             |                                                    | Accession no.     | Species                        | Identities | E-value |
| DK3_CDS_1  | 858         | Hypothetical protein                               | WP_104023704.1    | <i>Vibrio hyugaensis</i>       | 28%        | 1e-22   |
| DK3_CDS_2  | 537         | Fimbrial protein precursor                         | P_025010734.1     | <i>Shewanella</i> sp.          | 69%        | 1e-58   |
| DK3_CDS_3  | 708         | Molecular chaperone                                | WP_011918440.1    | <i>Shewanella putrefaciens</i> | 40%        | 8e-54   |
| DK3_CDS_4  | 2475        | Fimbrial biogenesis outer membrane usher protein   | WP_011918441.1    | <i>Shewanella putrefaciens</i> | 43%        | 0.0     |
| DK3_CDS_5  | 1269        | Fimbrial protein                                   | WP_045283300.1    | <i>Shewanella algae</i>        | 47%        | 3e-119  |
| DK3_CDS_6  | 705         | Molecular chaperone                                | WP_093983961.1    | <i>Shewanella algae</i>        | 34%        | 5e-32   |
| DK20_CDS_1 | 387         | Hypothetical protein                               | WP_065172226.1    | <i>Photobacterium damsela</i>  | 99%        | 2e-78   |
| DK20_CDS_2 | 1662        | Twin-arginine translocation pathway signal protein | WP_068946980.1    | <i>Photobacterium damsela</i>  | 99%        | 0.0     |
